# Supplementary material
Source: PubMed Central journal article supplement (PMC7947027)

## Inter-grader reproducibility at foveal center

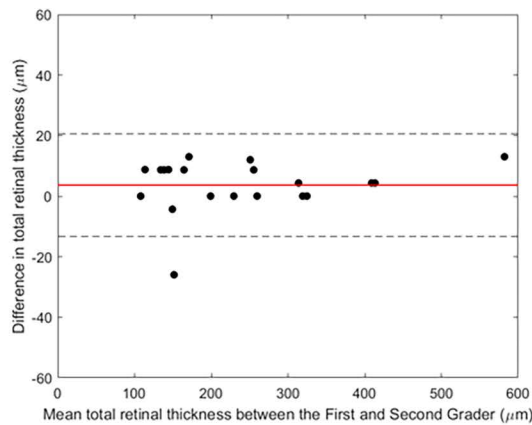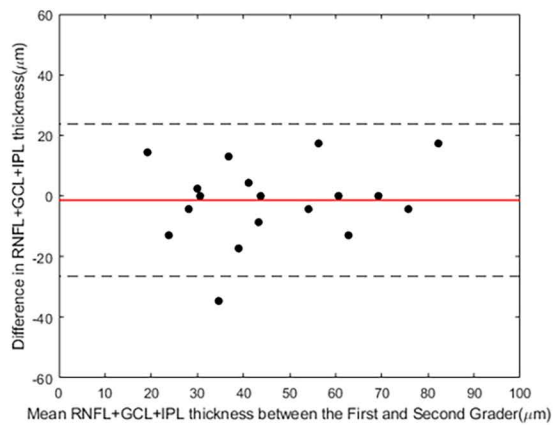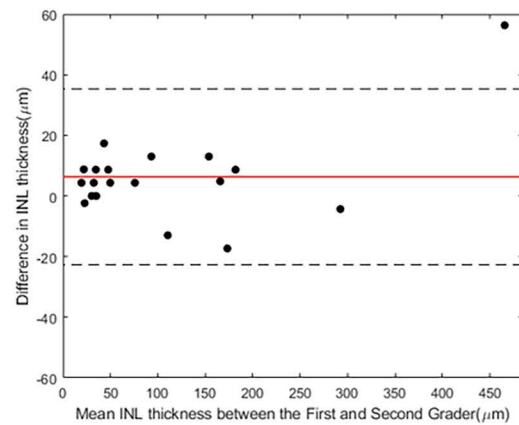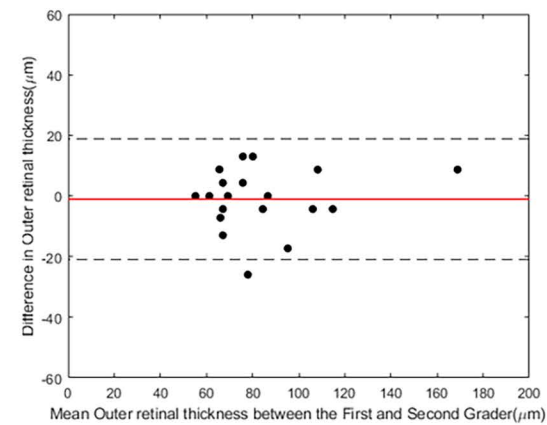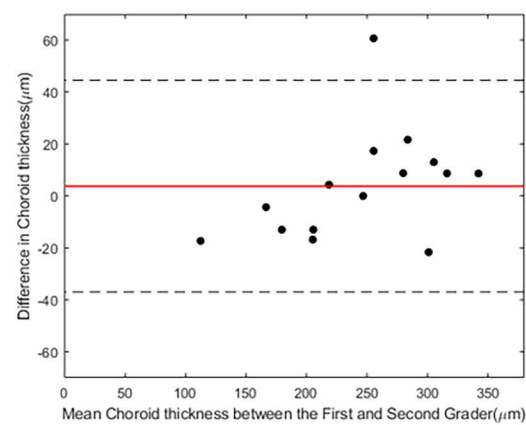

## Inter-grader reproducibility across the foveal center 1mm

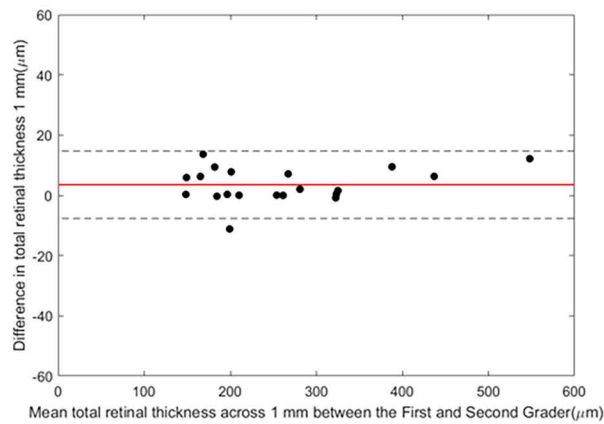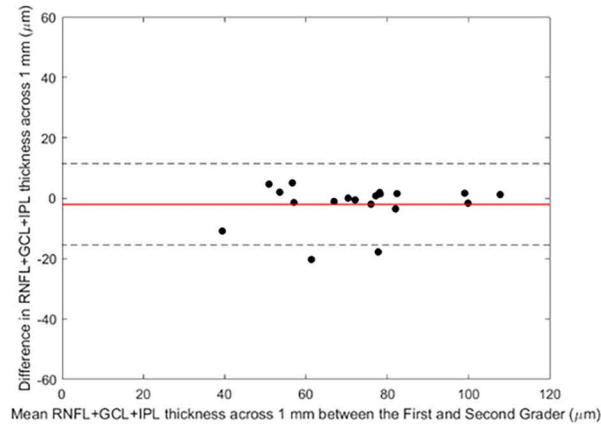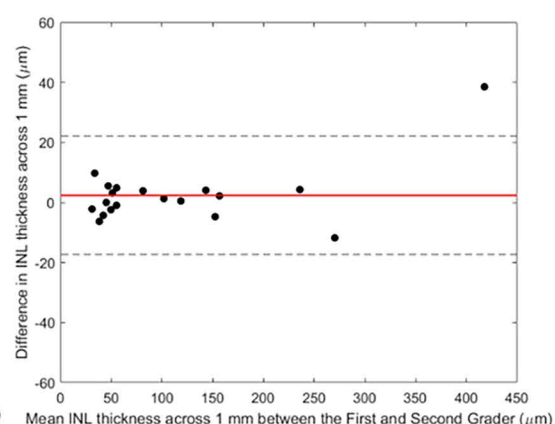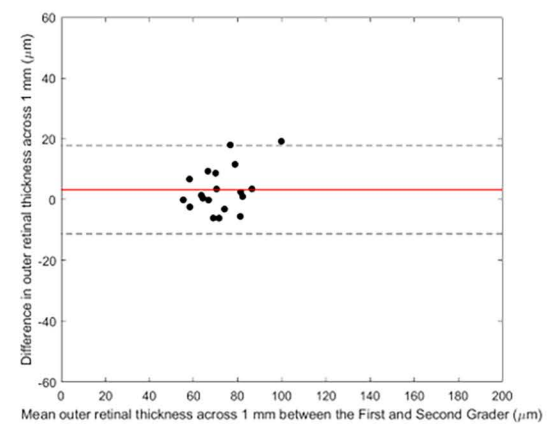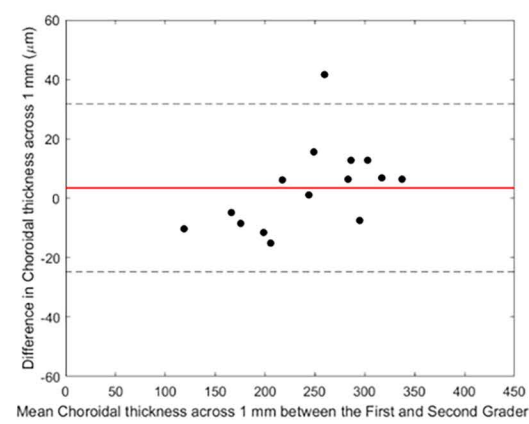

Supplement: NIHMS1632096-supplement-SF2.pdf [file NIHMS1632096-supplement-SF2.pdf]
