# Supplementary material
Source: PubMed Central journal article supplement (PMC7947027)
Supplement: NIHMS1632096-supplement-ST1.pdf [file NIHMS1632096-supplement-ST1.pdf]

**Supplementary Table 1:** List of clinical findings collected during retinopathy of prematurity screening

| Features                                    | Assessment                                                                               |
|---------------------------------------------|------------------------------------------------------------------------------------------|
| <b>Anterior Segment</b>                     |                                                                                          |
| Cornea                                      | Normal/Other                                                                             |
| Pupil size after dilation                   | In mm                                                                                    |
| Lens                                        | Clear/Other                                                                              |
| Tunica vasculosa lentis                     | None-Minimal/Mild-Moderate/Severe                                                        |
| <b>Fundus Exam</b>                          |                                                                                          |
| Fundus pigmentation                         | Blonde/Medium/Dark                                                                       |
| Media                                       | Clear/Hazy/No view                                                                       |
| Optic nerve abnormality                     | No/Hypoplasia/Elevation/Cupping/Pallor/Hyaloid stalk/Double ring sign/Blurred margins    |
| Macular edema                               | Absent/Questionable/Present/Unable to assess                                             |
| <b>ROP Findings</b>                         |                                                                                          |
| Posterior pole vessels by quadrant          | Normal/Pre-plus/Plus<br>Shunting                                                         |
| Zone                                        | I (Anterior/Posterior); II (Posterior/Mid/Anterior/Unspecified); III; Fully Vascularized |
| Highest Stage                               | Stage 0 to 5 (in the temporal and nasal quadrants)                                       |
| Popcorn                                     | Few (< 6)/Moderate (>6) not confluent/Areas of confluence (Sausage/Sinusoidal)           |
| ROP Type                                    | Type I (Y/N) (if yes, then presence of APROP)                                            |
| Hemorrhage                                  | Pre-retinal/Retinal/Vitreous                                                             |
| Post-treatment Laser Scars                  | Yes/No                                                                                   |
| Post-treatment regressed neovascularization | Yes/No                                                                                   |

APROP: Aggressive posterior retinopathy of prematurity
