# Supplementary material
Source: PubMed Central journal article supplement (PMC7947027)
Supplement: NIHMS1632096-supplement-ST2.pdf [file NIHMS1632096-supplement-ST2.pdf]

**Supplementary Table 2:** Comparison of central foveal thickness using investigational swept-source optical coherence tomography (OCT) systems (UC2 and UC3) and Envisu 2300 (Leica Microsystems, Buffalo Grove, IL) spectral domain OCT system in adult volunteers. We assessed the repeatability and reproducibility of measurements of center foveal thickness for these three handheld OCT systems in five adults, also under this IRB protocol, with 3-5 imaging sessions for each eye. For the adult volunteers, the central foveal thickness measurements obtained from three imaging systems were comparable; the most substantial difference between systems was 4.3%, which was comparable to intra-system variation in thickness measurements.

| <b>Subject No.</b> | <b>UC2<br/>Mean±SD* (n)<br/>in <math>\mu\text{m}</math></b> | <b>UC3<br/>Mean±SD* (n)<br/>in <math>\mu\text{m}</math></b> | <b>Envisu 2300<br/>Mean±SD* (n)<br/>in <math>\mu\text{m}</math></b> | <b>Largest difference<br/>between systems**<br/>(%)</b> |
|--------------------|-------------------------------------------------------------|-------------------------------------------------------------|---------------------------------------------------------------------|---------------------------------------------------------|
| 1                  | 169.1±6.6 (3)                                               | 173.8±4.2 (4)                                               | 172.8±2.4 (3)                                                       | 2.7                                                     |
| 2                  | 170.6±2.5 (3)                                               | 177.5±3.9 (5)                                               | 172.0±3.7 (3)                                                       | 4.0                                                     |
| 3                  | 203.5±5.0 (3)                                               | 212.5±2.4 (5)                                               | 208.0±1.4 (3)                                                       | 4.3                                                     |
| 4                  | 176.3±4.3 (3)                                               | 179.3±4.4 (5)                                               | 176.0±3.7 (3)                                                       | 1.9                                                     |
| 5                  | 197.8±0.0 (3)                                               | 196.8±4.4 (5)                                               | 200.0±7.3 (3)                                                       | 1.6                                                     |

\*All measurements were performed on the left eye of all adult volunteers

\*\*Largest difference between systems is calculated by the difference between the max and min value of the average of system measurements divided by the average measurement across systems
