# Supplementary material
Source: PubMed Central journal article supplement (PMC7947027)
Supplement: NIHMS1632096-supplement-ST4.pdf [file NIHMS1632096-supplement-ST4.pdf]

**Supplementary Table 4:** Intra- and inter-grader agreement for qualitative optical coherence tomography features

| OCT Characteristic<br>(N=123 pairs) | Intra-grader Agreement   |                |          |          |
|-------------------------------------|--------------------------|----------------|----------|----------|
|                                     | Percentage Agreement (%) | Kappa Estimate | Lower CI | Upper CI |
| Macular edema presence              | 91                       | 0.82           | 0.73     | 0.92     |
| Macular edema severity              | 85                       | 0.79           | 0.70     | 0.88     |
| Elongated cystoid spaces            | 87                       | 0.71           | 0.59     | 0.84     |
| Photoreceptor bulging               | 87                       | 0.72           | 0.60     | 0.85     |
| ELM presence                        | 98                       | 0.49           | -0.10    | 1        |
| EZ presence                         | 100                      | -              | -        | -        |
| Inter-grader Agreement              |                          |                |          |          |
| Macular edema presence              | 92                       | 0.85           | 0.78     | 0.91     |
| Macular edema severity              | 81                       | 0.71           | 0.64     | 0.78     |
| Elongated cystoid spaces            | 89                       | 0.75           | 0.66     | 0.84     |
| Photoreceptor bulging               | 68                       | 0.19           | 0.09     | 0.29     |
| ELM presence                        | 80                       | 0.41           | 0.29     | 0.54     |
| EZ presence                         | 97                       | 0.92           | 0.86     | 0.97     |

ELM: External limiting membrane; EZ: Ellipsoid zone
