# Supplementary material
Source: PubMed Central journal article supplement (PMC7947027)
Supplement: NIHMS1632096-supplement-ST5.pdf [file NIHMS1632096-supplement-ST5.pdf]

**Supplementary Table 5:** Intra-grader reproducibility results for both the graders for retinal layers and choroidal segmentation at the foveal center and across the center 1 mm

| <b>Intra-grader reproducibility of retinal and choroidal layer thicknesses at fovea (<math>\mu\text{m}</math>)</b>                      |                                  |                  |                  |            |                                           |                  |                  |            |                                           |                  |                  |            |
|-----------------------------------------------------------------------------------------------------------------------------------------|----------------------------------|------------------|------------------|------------|-------------------------------------------|------------------|------------------|------------|-------------------------------------------|------------------|------------------|------------|
|                                                                                                                                         | <b>Grader 1 (Original scan)*</b> |                  |                  |            | <b>Grader 1 (Original scan vs Scan 2)</b> |                  |                  |            | <b>Grader 2 (Original scan vs Scan 2)</b> |                  |                  |            |
|                                                                                                                                         | <b>Mean difference</b>           | <b>Lower LOA</b> | <b>Upper LOA</b> | <b>ICC</b> | <b>Mean difference</b>                    | <b>Lower LOA</b> | <b>Upper LOA</b> | <b>ICC</b> | <b>Mean difference</b>                    | <b>Lower LOA</b> | <b>Upper LOA</b> | <b>ICC</b> |
| <b>Total retina</b>                                                                                                                     | -0.21                            | -20.84           | 20.42            | 0.99       | -2.52                                     | -27.46           | 22.41            | 0.99       | 0.17                                      | -32.45           | 32.79            | 0.99       |
| <b>RNFL+GCL+IPL</b>                                                                                                                     | -5.84                            | -29.84           | 18.16            | 0.78       | -1.64                                     | -34.73           | 31.45            | 0.66       | 4.85                                      | -23.37           | 33.07            | 0.76       |
| <b>INL</b>                                                                                                                              | 4.09                             | -37.01           | 45.19            | 0.98       | 4.6                                       | -37.28           | 46.48            | 0.98       | -5.69                                     | -29.53           | 18.14            | 0.99       |
| <b>Outer retina</b>                                                                                                                     | 1.54                             | -13.61           | 16.7             | 0.95       | -5.49                                     | -33.59           | 22.61            | 0.84       | 1.01                                      | -33.3            | 35.33            | 0.82       |
| <b>Choroid</b>                                                                                                                          | -6.26                            | -49.45           | 36.94            | 0.92       | -3.12                                     | -69.83           | 63.6             | 0.86       | 3.76                                      | -31.49           | 39.01            | 0.96       |
| <b>Intra-grader reproducibility of retinal and choroidal layer thicknesses across the foveal center 1 mm (<math>\mu\text{m}</math>)</b> |                                  |                  |                  |            |                                           |                  |                  |            |                                           |                  |                  |            |
| <b>Total retina</b>                                                                                                                     | -0.27                            | -12.89           | 12.36            | 0.99       | -1.87                                     | -26.57           | 22.84            | 0.99       | -1.39                                     | -26.07           | 23.3             | 0.99       |
| <b>RNFL+GCL+IPL</b>                                                                                                                     | -3.46                            | -16.06           | 9.14             | 0.93       | -1.36                                     | -25.94           | 23.21            | 0.80       | 1.16                                      | -15.43           | 17.76            | 0.91       |
| <b>INL</b>                                                                                                                              | 0.11                             | -17.7            | 17.92            | 0.99       | 0.81                                      | -19.84           | 21.46            | 0.99       | -2.91                                     | -20.04           | 14.22            | 0.99       |
| <b>Outer retina</b>                                                                                                                     | 3.09                             | 4.64             | -6.01            | 0.89       | -1.31                                     | -12.43           | 9.81             | 0.85       | 0.36                                      | -22.22           | 22.94            | 0.53       |
| <b>Choroid</b>                                                                                                                          | -8.46                            | -49.13           | 32.21            | 0.92       | -4.85                                     | -61.37           | 51.66            | 0.89       | 4.31                                      | -35.95           | 44.57            | 0.95       |

\*The selection of the foveal center is applicable only to Grader 1 (original scan) with mean difference =-0.2, lower LOA=-3.54, upper LOA=3.14, ICC=0.99  
LOA: Limits of agreement; ICC: Inter-class correlation coefficient; RNFL: Retinal nerve fiber layer; GCL: Ganglion cell layer; IPL: Inner plexiform layer; INL: Inner nuclear layer
