# Supplementary material
Source: PubMed Central journal article supplement (PMC7947027)

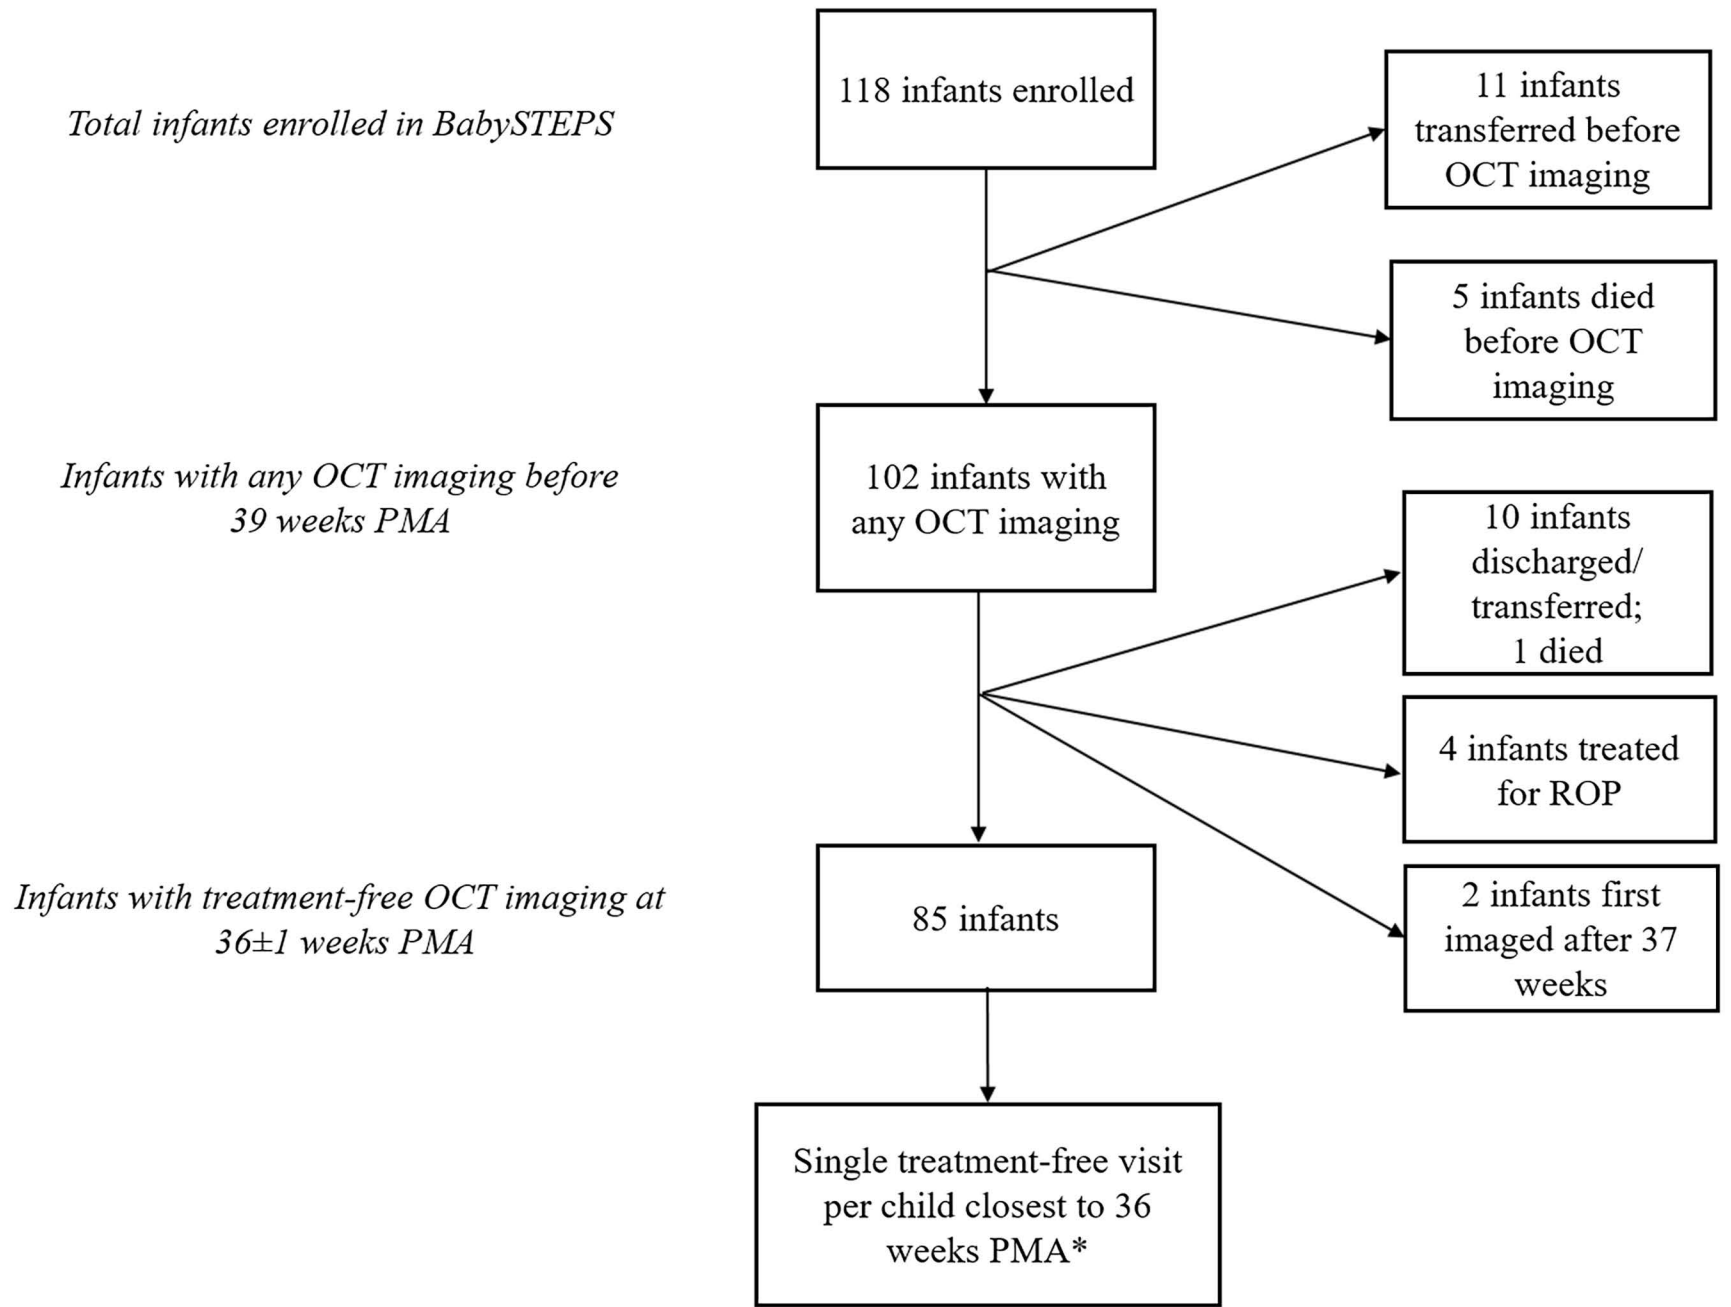

*\*one eye of one infant excluded due to treatment*

Supplement: NIHMS1632096-supplement-SF1.pdf [file NIHMS1632096-supplement-SF1.pdf]
